# Supplementary material for: Apoptosis-Inducing Factor Deficiency Induces Tissue-Specific Alterations in Autophagy: Insights from a Preclinical Model of Mitochondrial Disease and Exercise Training Effects
Source: MDPI journal article supplement (doi:10.3390/antiox11030510), 2022-03-07
Supplement: s1 [file s1]

**Supplementary Table S1.** Antibodies used.

| Primary antibody  | Company Reference      | Dilution (for WB) | Dilution (for IMF) |
|-------------------|------------------------|-------------------|--------------------|
| ACC1 (Ser79)      | Abcam ab68191          | 1:5000            |                    |
| 26S proteasome    | Abcam ab140675         | 1:1000            |                    |
| AMPK (Thr172)     | Cell Signalling #2535  | 1:1000            |                    |
| AMPK total        | Cell Signalling #5832  | 1:1000            |                    |
| ATG16L            | MBL PM040B             | 1:1000            |                    |
| ATP5A             | Abcam ab14748          | 1:5000            |                    |
| Beclin-1          | MBL PD017              | 1:1000            |                    |
| Catepsina B       | Cell Signalling #31718 | 1:1000            |                    |
| GAPDH             | SIGMA G9545            | 1:10000           |                    |
| LAMP1             | DSHB 1D4B              | 1:1000            |                    |
| LC3               | Sigma L7543            | 1:1000            | 1:500              |
| mTOR (Ser2448)    | Cell Signaling #5536   | 1:1000            |                    |
| MYL3              | ProteinTech 10913-1-AP | 1:2000            |                    |
| NDUFB8            | Abcam ab110242         | 1:500             |                    |
| p62               | Abcam ab109012         | 1:10000           |                    |
| TNNC1             | ProteinTech 13504-1-AP | 1:2000            |                    |
| TNNI3             | ProteinTech 21652-1-AP | 1:2000            |                    |
| TOM20             | ProteinTech 11802-1-AP | 1:10000           |                    |
| $\gamma$ -tubulin | BioRad VPA00655        | 1:2000            |                    |
| VDAC1             | Abcam ab14734          | 1:1000            |                    |

WB, western blot; IMF, immunofluorescence.
